# Supplementary material for: A machine learning analysis of COVID-19 mental health data
Source: Springer Nature journal article supplement (doi:10.1038/s41598-022-19314-1), 2022-09-02
Supplement: MOESM1 [file 41598_2022_19314_MOESM1_ESM.pdf]

**AppendixA. Some important features in the mental health data**

| Question                                                                                 | Levels                                                                                           | Question                                                                               | Levels                                                                                                                          |
|------------------------------------------------------------------------------------------|--------------------------------------------------------------------------------------------------|----------------------------------------------------------------------------------------|---------------------------------------------------------------------------------------------------------------------------------|
| Q1: What is your age?                                                                    | 10-20<br>21-30<br>31-40<br>41-50<br>51-60<br>61-70<br>71-80<br>81-90                             | Q6: What is your role in the healthcare field?                                         | Psychologist<br>Physician<br>Nurse<br>Psychiatrist<br>Social Worker<br>Research coordinator/manager/Public health/Staff<br>etc. |
| Q9: Are you conducting clinical video visits with your patients from your home?          | No<br>Yes                                                                                        | Q10: Does your work require you to follow fixed work schedule while working from home? | No<br>Yes                                                                                                                       |
| Q14: Has the number of your worked hours per week changed?                               | No<br>Yes                                                                                        | Q15: Have you varied your work schedule?                                               | No<br>Yes                                                                                                                       |
| Q16: Have your sleep patterns changed?                                                   | No<br>Yes                                                                                        | Q17: Has the number of naps you are taking changed?                                    | No<br>Yes                                                                                                                       |
| Q18: Has the amount of alcohol you are consuming changed?                                | No<br>Yes                                                                                        | Q19: In January 2020, approximately how often did you have a drink containing alcohol? | 4 or more times a week<br>2-4 times a month<br>2-3 times a week<br>Once a month or less<br>Never                                |
| Q20: In the last month, approximately how often did you have a drink containing alcohol? | 4 or more times a week<br>2-4 times a month<br>2-3 times a week<br>Once a month or less<br>Never | Q21: In January 2020, approximately how often did you use marijuana/cannabis?          | 4 or more times a week<br>2-4 times a month<br>2-3 times a week<br>Once a month or less<br>Never                                |

| Question                                                                                           | Levels                                                                                           | Question                                                                                  | Levels                                                                                                                    |
|----------------------------------------------------------------------------------------------------|--------------------------------------------------------------------------------------------------|-------------------------------------------------------------------------------------------|---------------------------------------------------------------------------------------------------------------------------|
| Q22: In the last month, approximately how often did you use marijuana/cannabis?                    | 4 or more times a week<br>2-4 times a month<br>2-3 times a week<br>Once a month or less<br>Never | Q23: Has the amount of news you are consuming increased since the end of Feb, 2020?       | No<br>Yes                                                                                                                 |
| Q24: How many hours of COVID-19 related news or social media are you consuming on average per day? | 4 or more times a week<br>2-4 times a month<br>2-3 times a week<br>Once a month or less<br>Never | Q25: Have you had more "screen time" e.g. use of smartphone, tablet, etc. around bedtime? | No<br>Yes                                                                                                                 |
| Q26: Have you changed your movement/exercise?                                                      | No<br>Yes                                                                                        | Q27: Has the quality of your diet changed?                                                | No<br>Yes                                                                                                                 |
| Q28: Has the amount of food you have been eating per day changed?                                  | No<br>Yes                                                                                        | Q29: Has your mood changed?                                                               | No<br>Yes                                                                                                                 |
| Q8: Are you currently conducting your job mostly from home now?                                    | No<br>Yes                                                                                        | Q29 (a): Please tell us how your mood has changed. My mood has been:                      | Much better<br>Moderately better<br>Slightly better<br>About the same<br>Slightly worse<br>Moderately worse<br>Much worse |

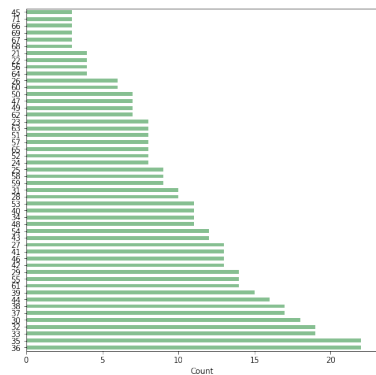

(A) Q1: What is your age?

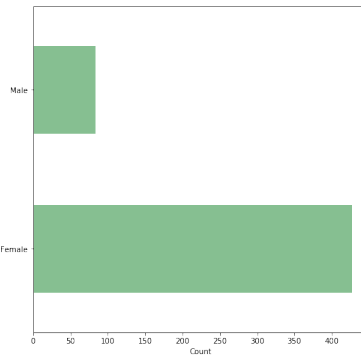

(B) Q2: What is your gender?

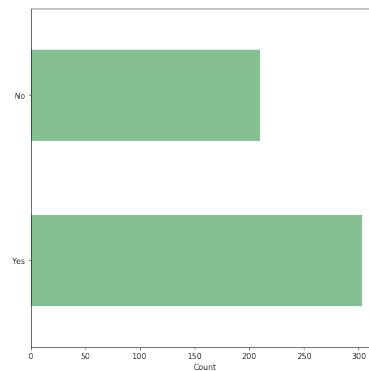

(C) Q8: Are you currently conducting your job mostly from home now?

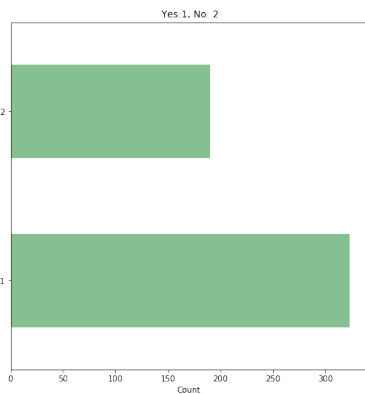

(D) Q9: Are you conducting clinical video visits with your patients from your home?

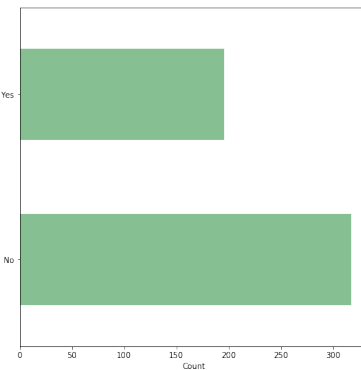

(E) Q10: Does your work require you to follow a fixed work schedule while working from home?

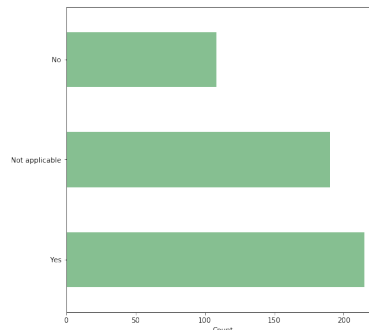

(F) Q11: Are children home from school in the house?

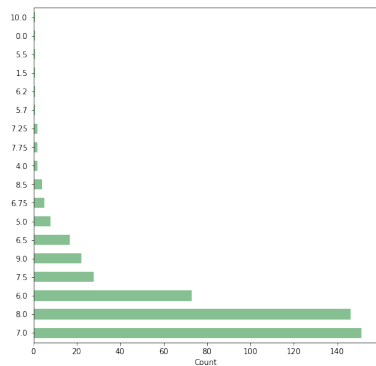

(G) Q12: Approximately how many hours did you sleep on an average work night in January 2020?

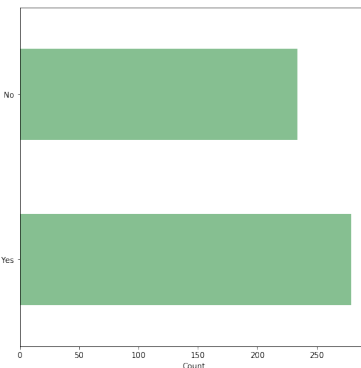

(H) Q14: Has the number of your work hours per week changed?

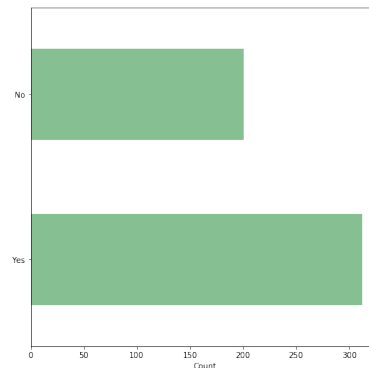

(I) Q15: Have you varied your work schedule?

FIGURE A.1 Frequency bar charts after the preprocessing phase

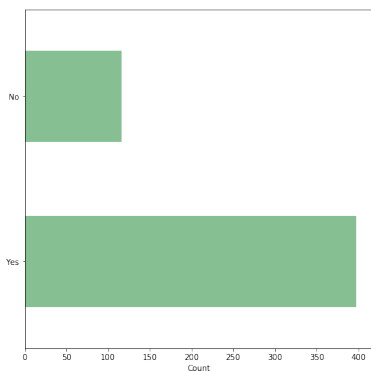

(A) Q16: Have your sleep patterns changed?

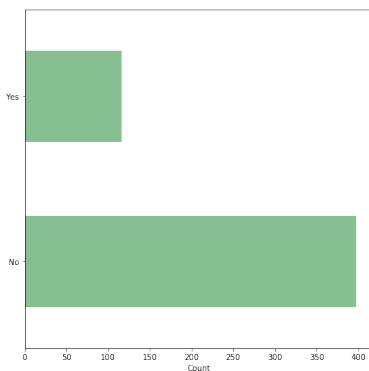

(B) Q17: Has the number of naps you are taking changed?

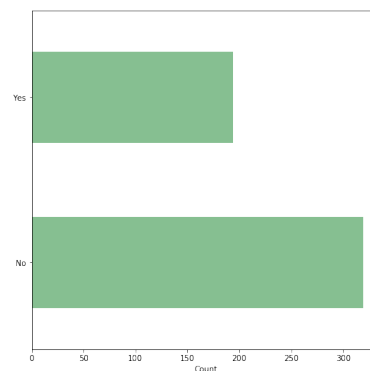

(C) Q18: Has the amount of alcohol you are consuming changed?

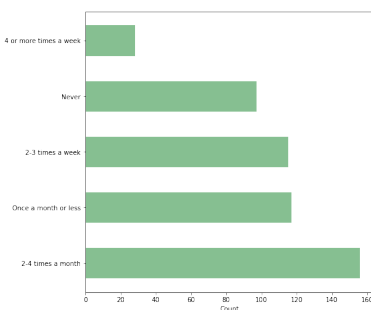

(D) Q19: In January 2020, approximately how often did you have a drink containing alcohol?

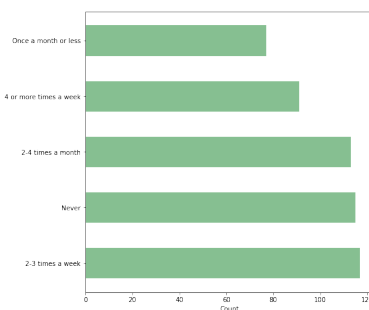

(E) Q20: In the last month, approximately how often did you have a drink containing alcohol?

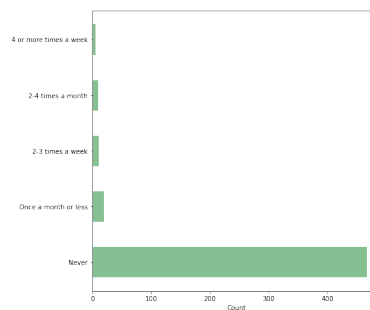

(F) Q21: In January 2020, approximately how often did you use marijuana/cannabis (recreational or medical)?

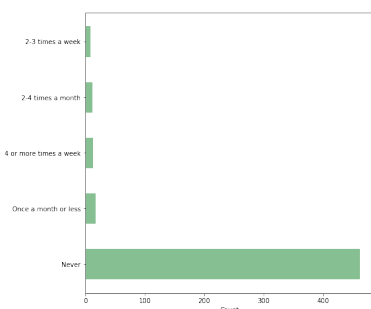

(G) Q22: In the last month, approximately how often did you use marijuana/cannabis (recreational or medical)?

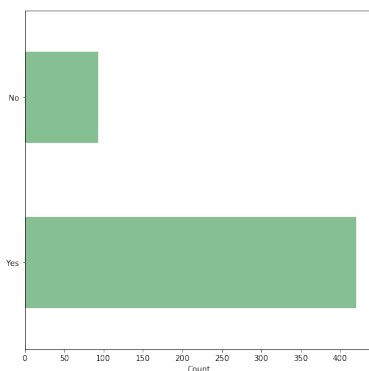

(H) Q23: Has the amount of news you are consuming increased since the end of Feb, 2020?

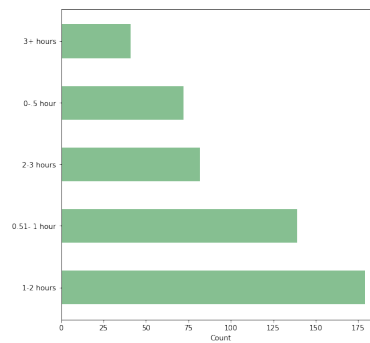

(I) Q24: How many hours of COVID-19 related news or social media are you consuming on average per day?

FIGURE A.2 Frequency bar charts after the preprocessing phase
